# Supplementary material
Source: PubMed Central journal article supplement (PMC7964923)
Supplement: 3255_table.pdf [file 3255_table.pdf]

**On-Line Table: Clinical and imaging characteristics of 13 patients with basilar trunk aneurysms**

| Case No, Sex, Age (yr) | Presentation                                               | Size (mm) | Imaging at Presentation                                                                   | Treatment                                                                                                                   | Complications                                         | Imaging Follow-Up                                                       | Clinical Follow-Up                                                             |
|------------------------|------------------------------------------------------------|-----------|-------------------------------------------------------------------------------------------|-----------------------------------------------------------------------------------------------------------------------------|-------------------------------------------------------|-------------------------------------------------------------------------|--------------------------------------------------------------------------------|
| 1, F, 58 (Ref. 22)     | SAH (HH III)                                               | 9         | SAH, hydrocephalus                                                                        | Neuroform stent <sup>a</sup> (4 × 30 mm) (2×), coils                                                                        | None                                                  | Complete occlusion, 3 mo (angio)                                        | GOS 2, 72 mo                                                                   |
| 2, F, 61               | SAH × 2 (HH IV)                                            | 20        | Giant dolichoectatic partially thrombosed fusiform aneurysm                               | LEO stent (5.5 × 75 mm), Silk (5.5 × 75 mm), left vertebral artery coil occlusion                                           | None                                                  | Complete occlusion, unchanged size (CT, 24 mo)                          | GOS 3, 24 mo                                                                   |
| 3, F, 70               | SAH (HH III)                                               | 30        | Giant dolichoectatic aneurysm                                                             | LEO stent (5.5 × 75 mm), coils                                                                                              | Hemiparesis postembolization                          | Brain stem infarction, small cerebellar infarction (MRI, 4 days)        | GOS 5, died of rebleed at 1 mo                                                 |
| 4, M, 65               | Dysphasia, gait ataxia, dysphagia                          | 30        | Giant dolichoectatic partially thrombosed fusiform aneurysm                               | LEO stent (5.5 × 75 mm) (2×), coils                                                                                         | Myocardial infarct during coiling with decompensation | Complete occlusion, unchanged size (MRI, 7 mo)                          | GOS 2, 7 mo, clinically improved                                               |
| 5, M, 66               | Diplopia, dysphagia                                        | 25        | Giant dolichoectatic, partially thrombosed aneurysm                                       | Enterprise stent (4.5 × 28 mm), coils                                                                                       | None                                                  | Complete occlusion, unchanged size (MRI, 24 mo)                         | GOS 1 at 24 mo, clinically improved                                            |
| 6, M, 48               | Intermittent brain stem symptoms                           | 30        | Giant dolichoectatic partially thrombosed fusiform aneurysm                               | LEO stent (2×) (5.5 × 75 mm + 5.5 × 60 mm), Silk (5.5 × 60 mm), coils, right vertebral artery coil occlusion                | None                                                  | Complete occlusion, unchanged size (MRI 3, mo)                          | GOS 2 at 3 mo, clinically unchanged                                            |
| 7, M, 64               | Abducens paresis                                           | 20        | Large dolichoectatic partially thrombosed aneurysm                                        | LEO stent (3×) (4.5 × 50 mm + 4.5 × 40 mm + 4.5 × 25 mm), Silk (4.0 × 35 mm), coils left vertebral artery balloon occlusion | In-stent thrombosis directly after embolization       | None                                                                    | GOS 5, died of in-stent thrombosis                                             |
| 8, M, 33               | PICA infarct, right distal VA dissection                   | 12        | Dissecting aneurysm, distal right VA occlusion                                            | Enterprise stent (4.5 × 28 mm), coils                                                                                       | None                                                  | Complete occlusion (MRI, 14 mo)                                         | GOS 1, 14 mo                                                                   |
| 9, F, 57               | Incidental                                                 | 30        | Giant partially thrombosed aneurysm, 5 additional aneurysms                               | Enterprise stent (4.5 × 22 mm), coils                                                                                       | None                                                  | Complete occlusion, progressive thrombosis, size unchanged (MRI, 18 mo) | GOS 1, 18 mo                                                                   |
| 10, M, 61              | Incidental finding, 30 months later brain stem compression | 25        | Giant dolichoectatic partially thrombosed fusiform aneurysm, increasing in size with time | LEO stent (5.5 × 75 mm), coils                                                                                              | Mute after coiling                                    | Small cerebellar infarctions on MRI next day                            | GOS 5, died from pulmonary embolism and metastatic bile duct carcinoma at 1 mo |
| 11, M, 67              | Incidental finding                                         | 20        | Large partially thrombosed dissecting aneurysm                                            | Enterprise stent (4.5 × 28 mm), coils                                                                                       | None                                                  | Complete occlusion (MRI, 6 mo)                                          | GOS 1, 6 mo                                                                    |
| 12, F, 65              | Incidental finding                                         | 25        | Giant dolichoectatic partially thrombosed fusiform aneurysm                               | LEO stent (3×) (4.5 × 40 mm + 4.5 × 50 mm + 5.5 × 50 mm), coils                                                             | None                                                  | Complete occlusion (angio, 12 mo), size unchanged (MRI, 12 mo)          | GOS 1, 12 mo                                                                   |
| 13, F, 61              | Incidental finding                                         | 20        | Dolichoectatic fusiform and 5 additional aneurysms                                        | LEO stent (4.5 × 50 mm), coils, left vertebral artery coil occlusion                                                        | None                                                  | Partial occlusion (angio, 7 mo)                                         | GOS 1, 7 mo                                                                    |

**Note:**—HH indicates Hunt and Hess scale; VA, vertebral artery; angio, angiography.  
<sup>a</sup> Boston Scientific, Natick, Massachusetts.
